## Index rerum ad Vol. 20

Confecit WILHELM BAUMANN, Zürich

- Acido nalidixico, 12  
 Adenomatoid tumors, 91  
 Angio-renographic studies in rats, 246  
 Aspiratio suprapubica, 1  
 Aspirations-biopsy of testis, 176  
 Bladder, electrical stimulation, 1  
 -, reticulum cell sarcoma, 29  
 -, retroperitoneal fibrosis, 29  
 -, Thio-Tepa in Papillomatosis, 23  
 -, traumatic cord, 1  
 Bladder tumeurs, histochemical study, 42  
 -, urinary Lactate-dehydrogenase, 359  
 Blase, retroperitoneale Fibrose, 29  
 -, Retothelsarkom, 29  
 -, traumatische Rückenmarksblase, 1  
 Blasentumoren, Behandlung mit Thio-Tepa, 23  
 -, Beta-Glucuronidasebestimmungen, 206  
 -, histochemische Untersuchungen, 42  
 -, Urin-Lactatdehydrogenase, 359  
 Bricker-Operation, 1  
 Calicolitotomia, 255  
 Cálculos de la prostata, prostatectomia transuretral, 319  
 Carcinome de la prostate, implants d'hormones, 289  
 Cystinuria, 154  
 Cystostomy, catheterless, 1  
 Dehydrogenase systems in bladder tumeurs, 42  
 Deisting, dilatatio prostatae, 17  
 Dilatation et prostatectomie, 17  
 Double-rein chez l'enfant, 100  
 Electrical stimulation of the bladder, 1  
 Epididyme, tumeurs adénomateuses, 91  
 Estrogen therapy in prostatic carcinoma, 289  
 Fibrose rétropéritonéale de la vessie, 29  
 Fosfatasas en los tumores de vejiga, 42  
 Glucuronidase y tumores vesicales, 206  
 Harnwegsinfektionen, Behandlung der therapieresistenten, 143  
 Hipertrofia prostática, dilatación, 17  
 -, -, la función renal, 191  
 -, -, resección transuretral, 17  
 Hoden, Aspirationsbiopsie, 176  
 Hoden, hormonale Untersuchungen nach Orchidektomie, 364  
 Hodentumoren, Behandlung, 129  
 Honvan, 289  
 Hyperparathyreoidism, electron microscopic study on the kidney, 319  
 Immunoélectrophorèse avant et après prostatectomie, 65  
 Induratio penis plastica, therapia, 236  
 Infections of the urinary passages, treatment, 143  
 Infections urinaires résistantes, traitement, 143  
 Kidney, double-kidney in the infant, 100  
 Lactate-dehydrogenase in bladder tumors, 359  
 Lithiase rénale, conceptions chirurgicales, 255  
 -, -, résection partielle du rein, 171  
 -, -, tuberculose, 77  
 Lymphatic circulation of the kidney, 305  
 Nalidixic acid, 12  
 Nebenhoden, adenomatoid-Tumoren, 91  
 Nephrolithiasis, neue chirurgische Behandlung, 255  
 -, Nierentuberkulose, 77  
 Niere, angio-renographische Untersuchungen, 246  
 -, Lymphwege, 305  
 -, Struktur des Beckenkelchsystems, 222  
 -, Studien bei Hyperparathyreoidismus, 319  
 Nierenlymphe, 305  
 Nierenpolresektion, 171  
 Orchidektomie, hormonale Untersuchungen, 364  
 Orina residual, 100  
 Papillomatosis, instillations of Thio-Tepa, 23  
 Penis, induratio plastica, 236

- Phosphatase et tumeurs de la vessie, 42  
 Plastic induration of the penis, 236  
 Prostatacarcinom, implantierte Hormonpreßlinge, 289  
 Prostatahypertrophic, Dilatation, 17  
 –, Nierenfunktion, 191  
 –, transurethrale Resektion, 17  
 Prostata-Steine, transurethrale Prostat-  
 ektomie, 319  
 Prostatectomie radicale transpubienne,  
 347  
 –, transurétrale pour calculs, 319  
 Prostatectomy, immunoelectrophoretic  
 studies, 65  
 –, treatment with Trasyol, 65  
 Prostatic hyperplasia, dilatation, 17  
 – –, renal functions, 191  
 – –, transurethral resection, 17  
 Rein, examen angiographique, 246  
 –, hyperparathyroïdisme, 319  
 –, la circulation lymphatique, 305  
 Renal calculus, resection of the renal  
 pole, 171  
 – calyceo-pelvic system, 222  
 – lithiasis, new surgical concepts, 255  
 – –, tuberculosis, 77  
 – lymphatics, 305  
 Renographische Untersuchungen bei  
 Ratten, 246  
 Résection transurétrale et la prostat-  
 ectomie, 17  
 Residual urine, 117  
 Reticulum cell sarcoma of the bladder,  
 29  
 Réthelsarcome de la vessie, 29  
 Retroperitoneal fibrosis of the bladder,  
 29  
 Riñon, duplicidad en el niño, 100  
 –, examen angiográfico, 246  
 –, hiperparatiroidismo experimental, 319  
 –, los linfáticos, 305  
 –, resección parcial, 171  
 –, sistema pielocalicial, 222  
 –, tuberculosis-litiasis, 77  
 Rückenmarksblase, traumatische, 1  
 Seminoma, 129  
 Suprapubic aspiration, 1  
 Suprapubic cystostomy, 1  
 Testicular carcinoma, 129  
 Testicule, l'orchidectomie et l'élimina-  
 tion hormonale, 364  
 Testiculo, biopsia con aguja aspiradora,  
 176  
 –, tratamiento de los tumores, 129  
 Thio-Tepa in papillomatosis of the  
 bladder, 23  
 Transpubic radical prostatectomy, 347  
 Transurethral prostatectomy for lithia-  
 sis, 336  
 –, resection, 17  
 Traumatic cord bladder, management, 1  
 Trasyol après prostatectomie, 65  
 Tuberculose, lithiasis rénale, 77  
 Tumeurs du testicule, traitement, 129  
 Urine résiduelle, 117  
 Urologia neurologica, 1  
 Vasectomy prophylactica, 163  
 Vejiga, estudio histoquímico de los  
 tumores, 42  
 – neurógena traumática, 1  
 Vesical Neoplasia et Beta-Glucuronid-  
 ase, 206  
 Vesicostomia, paralysis traumática, 1  
 Vessie du traumatisé médullaire, 1  
 –, Lacta-dehydrogenase lors de tumeur,  
 359  
 –, la  $\beta$ -gluconidase et les tumeurs, 206  
 –, l'étude histochimique des tumeurs, 42  
 –, structure du système pyélocaliciel, 222  
 –, traitement des tumeurs par Thio-  
 Tepa, 23
